# Supplementary material for: Perceptions about Research Participation among Individuals at Risk and Individuals with Premanifest Huntington’s Disease: A Survey Conducted by the European Huntington Association
Source: MDPI journal article supplement (doi:10.3390/jpm11080815), 2021-08-20
Supplement: s1 [file s1]

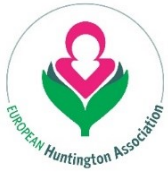

## Survey about the Perceptions and Experiences of Research Participation in the HD Community

\* 1. In what country do you live?

\* 2. What is your gender?

☐ Female

☐ Male

☐ Other

\* 3. What is your age?

☐ 18 to 24

☐ 25 to 34

☐ 35 to 44

☐ 45 to 54

☐ 55 to 64

☐ 65 to 74

☐ 75 or older

\* 4. What is the highest level of education you have completed?

**\* 5. What is your status regarding Huntington's Disease (HD)?**

- ☐ At risk of Huntington's Disease (You do not know if you carry the genetic mutation of Huntington's Disease and are at risk for inheriting the disease)
- ☐ Premanifest/Prodromal Stage of Huntington's Disease (You had a positive result in the genetic test for Huntington's Disease and do not show symptoms of the disease)

**\* 6. Have you ever participated in research studies related to Huntington's Disease?**

- ☐ Yes
- ☐ No

**\* 7. How do you rate your knowledge about research studies in Huntington's Disease?**

- |                                        |                                                               |
|----------------------------------------|---------------------------------------------------------------|
| <input type="radio"/> Not good         | <input type="radio"/> Good                                    |
| <input type="radio"/> Should be better | <input type="radio"/> Excellent                               |
| <input type="radio"/> Satisfactory     | <input type="radio"/> I do not want to know about HD research |

**\* 8. What are the main sources for you to get information about research studies in Huntington's Disease?**

☐ Internet

☐ Television

☐ Press/Newsletters/Flyers/Booklets

☐ International/National/Local HD Associations and/or Support Groups

☐ Health Care Professionals

☐ Family Members

☐ I am not interested in HD research information

**Is there anything you want to add?**

**\* 9. How important are the following reasons for getting involved in research studies in Huntington's Disease?**

|                                                                  | Not Important         | Slightly Important    | Moderately Important  | Important             | Very Important        |
|------------------------------------------------------------------|-----------------------|-----------------------|-----------------------|-----------------------|-----------------------|
| I will benefit from the best treatments                          | <input type="radio"/> |
| I will help to produce generalizable knowledge about HD          | <input type="radio"/> |
| My doctor thinks it is a good idea                               | <input type="radio"/> |
| I will help to benefit future generations                        | <input type="radio"/> |
| My family thinks it is a good idea                               | <input type="radio"/> |
| I will help others                                               | <input type="radio"/> |
| I know other people that also participate in HD research         | <input type="radio"/> |
| I will gain easier access to health professionals and HD experts | <input type="radio"/> |
| I have few therapeutic options                                   | <input type="radio"/> |
| I think it is interesting                                        | <input type="radio"/> |

**Is there anything you want to add?**

**\* 10. How important are the following reasons for not getting involved in research studies in Huntington's Disease?**

|                                                                              | Not Important         | Slightly Important    | Moderately Important  | Important             | Very Important        |
|------------------------------------------------------------------------------|-----------------------|-----------------------|-----------------------|-----------------------|-----------------------|
| I do not want to get false hopes                                             | <input type="radio"/> |
| I do not think I can be of any help                                          | <input type="radio"/> |
| I do not think there will be any drugs available in my life time             | <input type="radio"/> |
| I do not want to be reminded about the future progression of my disease      | <input type="radio"/> |
| I do not have time in my life right now                                      | <input type="radio"/> |
| I do not trust the research team                                             | <input type="radio"/> |
| I do not want to go to clinical units                                        | <input type="radio"/> |
| I do not want to be examined                                                 | <input type="radio"/> |
| I do not want to take drugs right now                                        | <input type="radio"/> |
| I do not feel emotionally stable                                             | <input type="radio"/> |
| I do not want to be seen as a "guinea pig"                                   | <input type="radio"/> |
| I fear that my personal data will not be treated as confidential information | <input type="radio"/> |

**Is there anything you want to add?**

**\* 11. Which of the following factors would prevent you from participating in research studies in Huntington's Disease?**

- ☐ I would have to travel to the study site
- ☐ I would not have family support
- ☐ I would have personal expenses
- ☐ I would have to do motor exams
- ☐ I would have to find someone to take care of my sick parent
- ☐ I would have to skip work days/hours
- ☐ I would have to be involved in the study for a long time
- ☐ I would have to go through invasive procedures (e.g., lumbar puncture or surgery)
- ☐ I would have to do cognitive assessments
- ☐ I would have to find someone to take care of my children
- ☐ I would have to rethink my decisions about family planning
- ☐ None of the above

**Is there anything you want to add?**

**\* 12. Which of the following factors would facilitate your participation in research studies in Huntington's Disease?**

- ☐ I would have assistance from a patient advocate
- ☐ I would have family support
- ☐ The researcher is my doctor/my family member doctor
- ☐ My personal expenses would be reimbursed
- ☐ I would get the chance to meet other HD families
- ☐ I would gain easier access to treatments, health professionals and HD experts
- ☐ I would have psychological and social care available
- ☐ I would not have to go through invasive procedures (e.g., lumbar puncture or surgery)
- ☐ I know and trust the study team
- ☐ I would have regular feedback about my health condition
- ☐ None of the above

**Is there anything you want to add?**
